## Aortic Valve Insufficiency in a 45-Year-Old Male

Monte Willis, MD, PhD, Michael Roth, MD, Peter Gilligan, PhD

(Department of Pathology & Laboratory Medicine, University of North Carolina, Chapel Hill, NC)

DOI: 10.1309/2H22RX573X0GWFAB

|                                                                                                                                                                                                                                                                                                                                                                                                                                                                                                                      |                                                                                                                                                                                                                                                                                                                                                                                                                                                                                    |                                                                                                                                                                                                                                                                                                                                                                   |
|----------------------------------------------------------------------------------------------------------------------------------------------------------------------------------------------------------------------------------------------------------------------------------------------------------------------------------------------------------------------------------------------------------------------------------------------------------------------------------------------------------------------|------------------------------------------------------------------------------------------------------------------------------------------------------------------------------------------------------------------------------------------------------------------------------------------------------------------------------------------------------------------------------------------------------------------------------------------------------------------------------------|-------------------------------------------------------------------------------------------------------------------------------------------------------------------------------------------------------------------------------------------------------------------------------------------------------------------------------------------------------------------|
| <p><b>Patient</b><br/>45-year-old male.</p> <p><b>Chief Complaint</b><br/>Feeling under the weather, unable to go to work.</p> <p><b>Past Medical History</b><br/>Patient was referred from an outside hospital for evaluation of his aortic valve insufficiency. A transthoracic echocardiography study performed at an outside hospital within the previous week was not diagnostic for endocarditis and multiple blood cultures were negative. The patient has a history of ethanol abuse and poor dentition.</p> | <p><b>Family History</b><br/>Unremarkable.</p> <p><b>Physical Exam</b><br/>Vital signs: temperature, 36.2°C; heart rate, 110 beats per minute; respiratory rate, 20 per minute; blood pressure 90/60 mm Hg. Skin: No rash. Extremities: No clubbing, cyanosis, edema. Pulmonary: Clear to auscultation bilaterally. Cardiac: Tachycardic with regular rhythm, 5/6 diastolic murmur (aortic area). Extremities: Unremarkable. Neuro: Alert and oriented, cranial nerves intact.</p> | <p><b>Principal Laboratory Findings (Table 1)</b></p> <p><b>Results of Additional Diagnostic Procedures</b><br/>Chest x-ray: Bilateral pleural effusions and diffuse interstitial prominence, consistent with interstitial edema. A transthoracic echocardiogram performed at admission identified severe aortic and mitral valve regurgitation. EKG: Normal.</p> |
|----------------------------------------------------------------------------------------------------------------------------------------------------------------------------------------------------------------------------------------------------------------------------------------------------------------------------------------------------------------------------------------------------------------------------------------------------------------------------------------------------------------------|------------------------------------------------------------------------------------------------------------------------------------------------------------------------------------------------------------------------------------------------------------------------------------------------------------------------------------------------------------------------------------------------------------------------------------------------------------------------------------|-------------------------------------------------------------------------------------------------------------------------------------------------------------------------------------------------------------------------------------------------------------------------------------------------------------------------------------------------------------------|

### Questions:

1. What are this patient's most striking clinical and laboratory findings?
2. How do you explain this patient's most striking clinical and laboratory findings?
3. What additional test(s) should be ordered on this patient and why?
4. What is this patient's most likely diagnosis?
5. How is this patient's condition typically treated?

### Possible Answers:

1. Significant clinical findings in this patient include tachycardia (HR>100), hypotension, 5/6 diastolic murmur, a history of prior and current dental disease, including tooth extractions on the day of admission, transesophageal echocardiogram with severe aortic and mitral valve regurgitation, pulmonary edema, and a normal EKG. Significant laboratory findings include multiple negative blood cultures (outside hospital), normocytic anemia, and a normal white cell count.

2. **Sinus tachycardia** (>100 beats/minute) in the absence of arrhythmia is a physiologic response to stress. Causes include fever, anxiety, exercise, thyrotoxicosis, hypoxemia, hypotension, congestive heart failure, or volume depletion. **Hypotension** can result from shock, a clinical syndrome characterized by hypoperfusion (and hypo-oxygenation) of organs. Shock has a variety of causes, generally categorized by hypovolemic shock (inadequate circulating volume, plasma volume loss, or excessive water and

**Table 1\_Principal Laboratory Findings**

| Test              | Patient's Result | "Normal" Reference Interval    |
|-------------------|------------------|--------------------------------|
| <b>Hematology</b> |                  |                                |
| WBC Count         | 9.5              | 4.5-11.0 x10 <sup>9</sup> /L   |
| RBC               | 3.51             | 4.50-5.90 x10 <sup>12</sup> /L |
| HCT               | 34.2             | 41.0-53.0%                     |
| MCV               | 93               | 80-100 fL                      |
| Platelets         | 170              | 150-440 x10 <sup>9</sup> /L    |
| <b>Chemistry</b>  |                  |                                |
| Sodium            | 137              | 135-145 mmol/L                 |
| Potassium         | 3.4              | 3.5-5.0 mmol/L                 |
| Chloride          | 110              | 98-107 mmol/L                  |
| CO <sub>2</sub>   | 21               | 22-30 mmol/L                   |
| BU <sub>N</sub>   | 6                | 7-21 mg/dL                     |
| Creatinine        | 0.7              | 0.8-1.4 mg/dL                  |
| TSH               | 3.36             | 0.46-4.68 microIU/ml           |

WBC, white blood cell; RBC, red blood cells; HCT, hematocrit; MCV, mean corpuscular volume; BU<sub>N</sub>, blood urea nitrogen; AST, aspartate aminotransferase; ALT, alanine aminotransferase; ALP, alkaline phosphatase; GGT, gamma-glutamyl transferase; CK, creatine kinase.

electrolyte loss), septic shock (infection), or neurogenic shock (drugs, spinal anesthesia). Lastly, cardiogenic shock can cause hypotension due to impaired contractility (mitral insufficiency, aortic insufficiency, dilated cardiomyopathy, acute myocardial infarction), decreased preload (right ventricular infarction, pulmonary embolism, pericardial tamponade), excessive afterload (malignant hypertension, aortic stenosis, hypertrophic cardiomyopathy). **Aortic regurgitation** (AR) results from aortic valve cusp thickening and shortening, which prevents complete closing during diastole. This results in a diastolic murmur, which represents

the backflow of blood through the incompletely closed aortic valve. Nearly 2/3 of patients with AR have a history of rheumatic disease, which is mainly associated with mitral valve defects.<sup>1</sup> Rheumatic disease less commonly causes isolated aortic valve disease. Other causes of aortic regurgitation include congenital membrane subaortic stenosis (thickened valve leaflets), rheumatoid spondylitis, congenital bicuspid valves, prolapse secondary to ventricular septal defects, and congenital fenestrations of the aortic valve.<sup>1</sup> Primary aortic root disease resulting in the separation of the aortic valve leaflets can cause aortic regurgitation. Aortic root disease may manifest in Marfan's syndrome, idiopathic dilation of the aorta, syphilis, ankylosing spondylitis, and severe hypertension, which may develop into progressive AR. Acute aortic regurgitation can also result from infective endocarditis which can occur on valves previously damaged by rheumatic disease, congenitally deformed valves, and on occasion a normal aortic valve.<sup>1</sup> The most common causes of **pulmonary edema** include heart failure and volume overload. The functional consequence of pulmonary edema is the failure of gas exchange due to the excess fluid in the lungs.

**3. Echocardiography** should be performed in patients where the suspicion of endocarditis is high. Transesophageal echocardiogram (TEE) is able to anatomically confirm the presence of a vegetation and determine its size in >90% of patients with endocarditis. Transesophageal echocardiograms can also be used to assess for abscesses and determine cardiac function. Transesophageal echocardiogram has a higher sensitivity of detection cardiac valve vegetations than transthoracic echocardiography (TTE). The patient in the present case underwent both transthoracic and transesophageal echocardiography, both of which revealed a markedly thickened, bicuspid aortic valve. Moreover, large filamentous and highly mobile vegetations were noted on the two aortic cusps and on the chordae of the medial papillary muscle just adjacent to the mitral valve (**Image 1**). The large aortic valve vegetation measured approximately 29 mm in length. The vegetation adjacent to the mitral valve was multilobular and measured approximately 20 mm in length. Significant aortic and mitral valve insufficiency was identified by Doppler mode. No abnormalities were identified on the right side of the heart. A cardiac MRI was additionally performed to

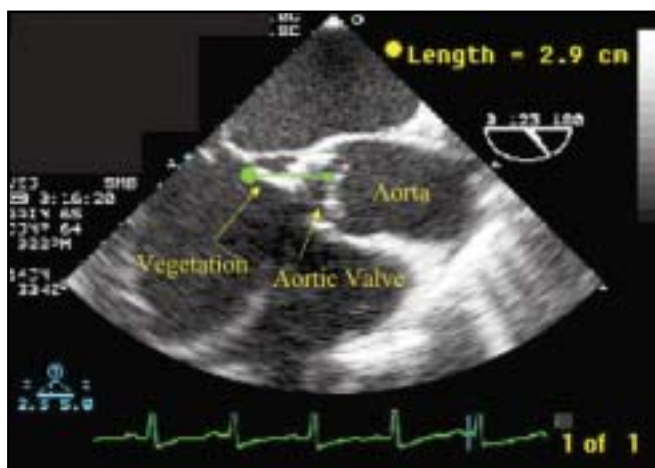

**Image 1** Trans-esophageal echocardiographic study of the patient described in this study. Vegetation (Green Line) on the aortic valve was present and floating freely upon trans-esophageal echocardiography in this patient upon presentation.

evaluate the patient for abscess formation. There was no evidence of abscess formation by either echo or MRI. **Blood cultures** should be performed because identification of an organism is critical for both the diagnosis of endocarditis and selection of appropriate antibiotics.<sup>2</sup> In the absence of prior antibiotic treatment, 3 blood cultures should be collected from different venipuncture sites over 24 hours. If the cultures are negative, additional blood cultures should be performed after 48 to 72 hours and the laboratory notified that they should look for fastidious organisms by extending the incubation time.<sup>1,2</sup> Patients with deteriorating hemodynamics should be treated empirically for endocarditis. Peripheral blood cultures were collected from 2 sites on day 1 and the day after admission in the present case. Aerobic and anaerobic cultures were negative after 1 week. **Serological tests** can help determine the identification of organisms that are difficult to recover by blood culture. In the United States, serology testing for *Coxiella burnetii* is used with some frequency, while additional testing for *Brucella* and *Bartonella* is used with more frequency in other parts of the world. **Studies to assist in the management** of endocarditis include CBC, creatinine, chest radiograph, EKG, and cardiac catheterization in patients who undergo valve replacement to assess for coronary artery disease. The indications for surgery with endocarditis include heart failure, uncontrolled infection, significant valve dysfunction, artificial valve replacement, abscess formation, or recurrent emboli.<sup>3</sup> The decision to replace this patient's valve was based on his significant aortic and mitral valve dysfunction. The patient underwent cardiac catheterization, which identified a 75% blockage in his left anterior descending coronary artery. A head CT with contrast was performed to identify possible septic emboli and was negative. **Direct examination** of pathogens can identify vegetations by microscopic examination, culture, special stains, and PCR identification. On day 5 of the patient's hospital stay, he underwent surgery to replace/repair his aortic and mitral valve in addition to coronary artery bypass surgery on his left anterior descending coronary artery. The aortic and mitral valves were sent to microbiology for direct examination and culture. The valves were minced, placed on slides, and Gram stained. Gram-positive cocci in chains were abundant throughout the specimens (**Image 2**). Both aortic and mitral valves were processed for histology (**Image 3**) and demonstrated fibrosis with focal areas of granulation tissue, fibrinopurulent exudates, and acute inflammation consistent with endocarditis. Tissue Gram stains showed sheets of gram-positive cocci when stained with a modified Brown and Brenn Gram stain. Aerobic and anaerobic cultures of the aortic and mitral valve were negative after 1 week as were cultures for fungus, *Legionella*, and *Actinomyces*.

**Molecular detection.** Currently few laboratories have the capability to detect bacteria other than *Chlamydia trachomatis* and *Neisseria gonorrhoeae* by molecular means. However this is a potentially powerful alternative to diagnosing infections from internal body sites such as cardiac vegetations in a patient with culture negative endocarditis.<sup>4-11</sup> In this approach, primers with a broad range are used to amplify specific regions of the 16S rRNA gene. The resulting amplicons are then sequenced and the obtained sequence is matched with known sequences for specific organisms. If the obtained sequence matches a known organism sequence, the patient is considered infected by this organism.

**4. Most likely diagnosis:** Infective endocarditis due to viridins streptococci.

The **Duke Criteria** are used to diagnose infective endocarditis using both clinical and laboratory findings (**Table 2**).<sup>12</sup> Infective

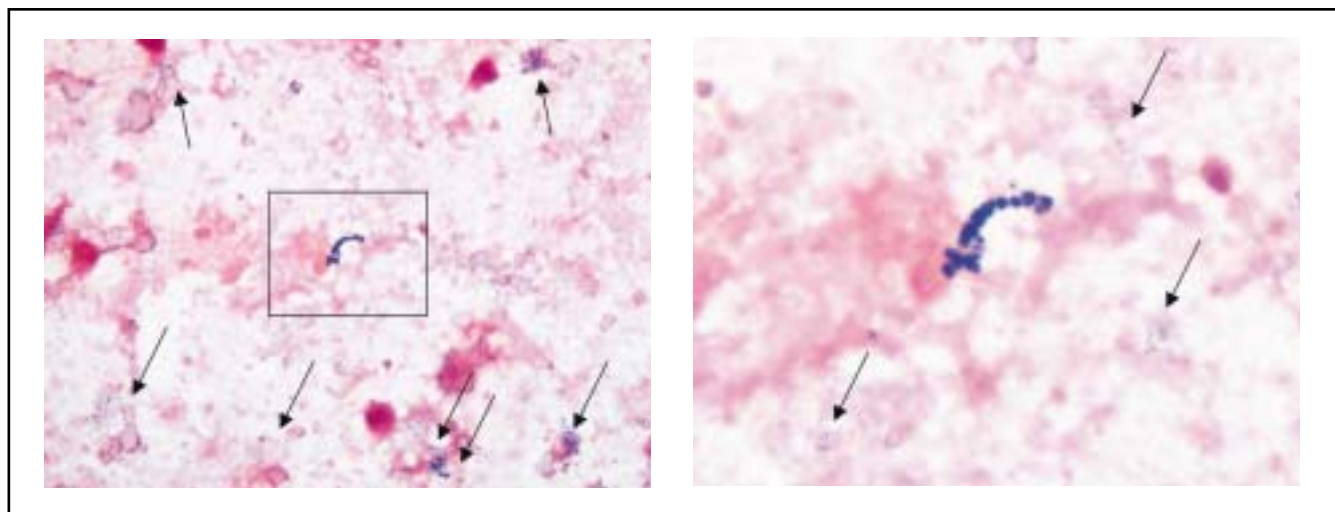

**Image 2** Mitral valve biopsy Gram stain seen at 400x (left) and 100x (right) demonstrates gram-positive cocci in chains. Distributed throughout the biopsy preparation, gram-positive cocci that stain poorly are present (arrows) and may represent the results of pre-surgical antibiotic therapy.

endocarditis can be diagnosed in 4 ways. The diagnosis can be made if there is positive valve culture or histology. In the present case, gram-positive cocci in chains were identified from the valves removed during surgery, which confirms the diagnosis of infective endocarditis. A patient can also be diagnosed if they have 2 major criteria: 1) typical organism present; 2) positive echo for vegetations; 3) abscess/valve dehiscence OR 5 of 6 minor criteria: 1) valvular heart disease; 2) fever; 3) vasculitis; 4) skin lesions; 5)

suggestive echo; 6) positive blood culture. Lastly, the diagnosis of infective endocarditis can be made if 1 major and 3 minor criteria are met. The presence of gram-positive cocci in chains in the present case is suggestive of *Streptococcus* and *Enterococcus* spp., both of which have been implicated in infective endocarditis (Table 3). In native valve infective endocarditis, 45% to 65% are caused by *Streptococcus* species, while 5% to 8% are caused by *Enterococcus* species.<sup>2</sup> Of the *Streptococcus* spp. implicated in

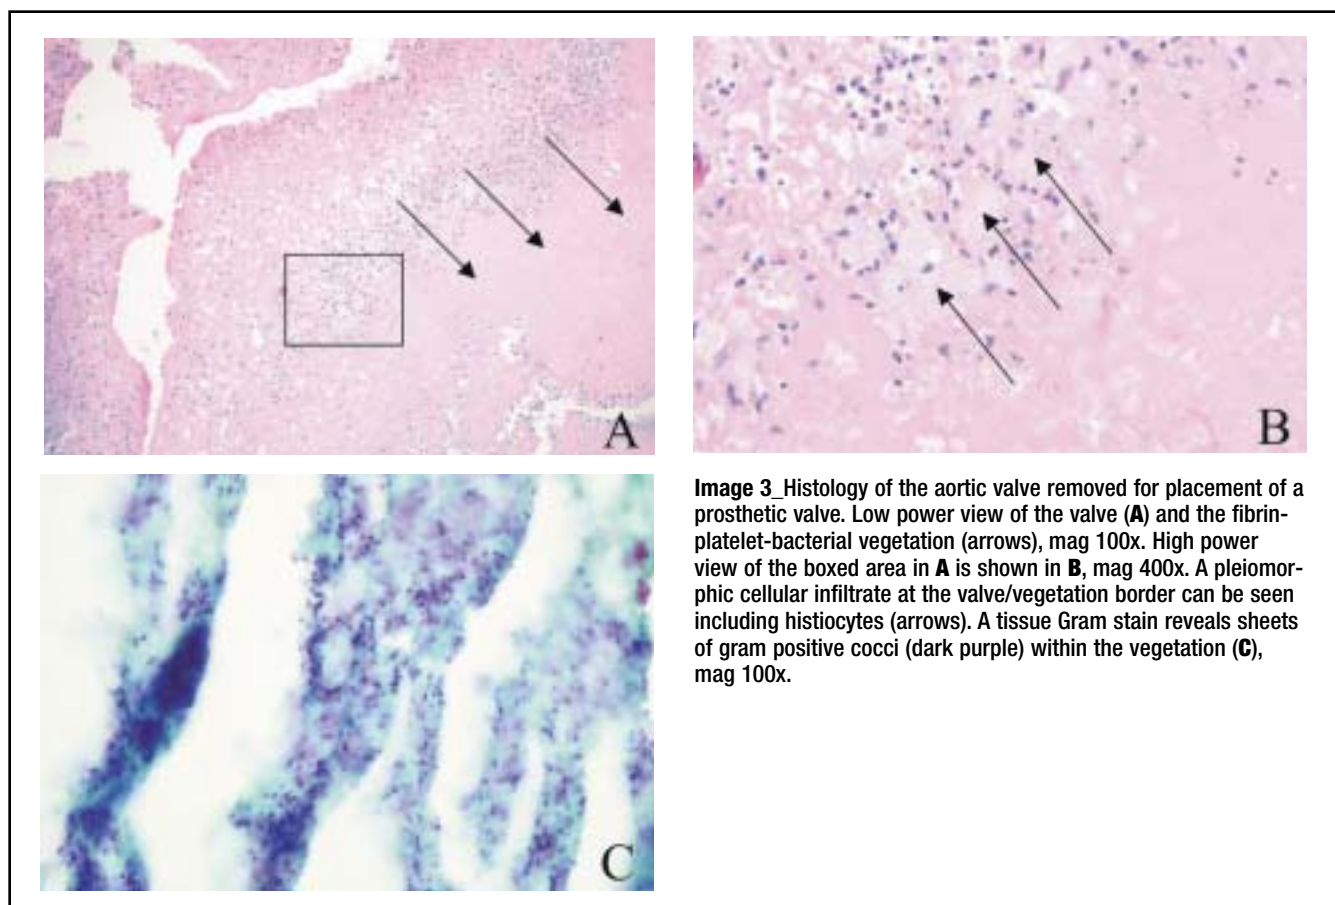

**Image 3** Histology of the aortic valve removed for placement of a prosthetic valve. Low power view of the valve (A) and the fibrin-platelet-bacterial vegetation (arrows), mag 100x. High power view of the boxed area in A is shown in B, mag 400x. A pleiomorphic cellular infiltrate at the valve/vegetation border can be seen including histiocytes (arrows). A tissue Gram stain reveals sheets of gram positive cocci (dark purple) within the vegetation (C), mag 100x.

**Table 2 Diagnostic (Duke) Criteria of Infective Endocarditis**

|                                                     |    |
|-----------------------------------------------------|----|
| 1. Positive valve culture or histology              | OR |
| 2. 2 major criteria:                                |    |
| a. Typical organism                                 |    |
| b. Positive echocardiography for vegetations        |    |
| c. Abscess or valve dehiscence                      | OR |
| 3. 5 of 6 minor criteria:                           |    |
| a. Valvular heart disease or IV drug abuse          |    |
| b. Fever greater than 38°C                          |    |
| c. Vasculitis                                       |    |
| d. Skin lesions                                     |    |
| e. Suggestive echocardiography (but not definitive) |    |
| f. Positive blood culture                           | OR |
| 4. 1 major and 3 minor criteria                     |    |

Adapted from: Durack DT, et al., Am J Med, 1994;96:200-209.

endocarditis, 75% are due to viridans group streptococcus, 20% to *Streptococcus bovis*, and the remaining 5% are due to other *Streptococcus* spp. Viridans group streptococcus are found mainly in the oral cavity, where trauma to the tissues can precipitate bacteremia. The severity of periodontal disease and the intensity of the trauma play a role in the magnitude and frequency of bacteremia. *Enterococcus* bacteremia, on the other hand, is associated with examination and instrumentation of the gastrointestinal and genitourinary tract.<sup>13</sup> The patient in the current study had 2 negative aerobic and anaerobic blood cultures in addition to a negative aortic valve biopsy culture plated both aerobically and anaerobically. Therefore, the history of poor dentition in this patient, along with the gram-positive cocci in chains detected in the vegetation itself, leads to the likely conclusion that this patient had viridans streptococcus endocarditis.

The incidence of infective endocarditis continues to rise with a yearly incidence of around 15,000 to 20,000 new cases in the United States.<sup>14</sup> The incidence of community-acquired infective endocarditis (IE) on native-valves in the United States and western Europe is approximately 1.7 to 6.2 cases per 100,000 people per year.<sup>2</sup> Men are affected almost twice as much as women (1.7:1), and the median age is 47 to 69 years.<sup>2</sup> When endocarditis is associated with intravenous drug use, the incidence is approximately 150 to 2000 per 100,000 people per year.<sup>2</sup> Multiple conditions pre-dispose people to infective endocarditis including diabetes mellitus, hemodialysis (long-term), and poor dental hygiene.<sup>2</sup> The most common cardiovascular disease associated with infectious endocarditis is mitral valve prolapse (100 per 100,000 person with IE per year).<sup>2</sup> Rheumatic heart disease, as a result of group A streptococcus infection in the young, is the most common pre-disposing factor leading to infective endocarditis in the world.<sup>2</sup>

Endothelial cells in the vasculature are resistant to bacteria and thrombus formation unless they are injured. Endothelial cell injury may result in turbulent flow that can be conducive to either infection or the development of platelet-fibrin thrombus (non-bacterial thrombotic endocarditis).<sup>1</sup> The formation of a thrombus can also serve as a place where bacteria can attach during episodes of bacteremia. Organisms found in endocarditis (Table 3) enter the blood from skin, mucosal surfaces, or discrete infections. Most bacteria adhere directly to thrombi except more virulent bacteria such as *S. aureus*, which can adhere to the endothelial cells/sub-endothelium directly.<sup>1</sup> The proliferating

**Table 3 Etiologic Agents Found in Native-Valve Infective Endocarditis**

| Pathogen                     | Native Valve Patient age 16-60 years old | Prosthetic Valve <60 days (60 days-12 months) after procedure |
|------------------------------|------------------------------------------|---------------------------------------------------------------|
| <i>Streptococcus</i> spp.    | 45-65%                                   | 1 (7-10)%                                                     |
| <i>Staphylococcus aureus</i> | 30-40%                                   | 20-24 (10-15)%                                                |
| Coag-neg staphylococci       | 4-8%                                     | 30-35 (30-35)%                                                |
| <i>Enterococcus</i>          | 5-8%                                     | 5-10 (10-15)%                                                 |
| Gram-neg bacilli             | 4-10%                                    | 10-15 (2-4)%                                                  |
| Fungi                        | 1-3%                                     | 5-10 (10-15)%                                                 |
| Culture neg/HACEK* organisms | 3-10%                                    | 3-7 (3-7)%                                                    |
| Diphtheroids                 | <1%                                      | 5-7 (2-5)%                                                    |
| Polymicrobial                | 1-2%                                     | 2-4 (4-7)%                                                    |

Adapted from: Mylonakis et al., N Engl J Med. 2001;345(18):1318.

\*HACEK: *Haemophilus* spp., *Actinobacillus actinomycetemcomitans*, *Cardiobacterium hominus*, *Eikenella la corrodens*, *Kingella kingae*.

organisms at the valve site induce tissue factor (TF) which is released from monocytes and/or endothelial cells, initiating the coagulation cascade, leading to fibrin deposition at the site. This leads to the formation of "vegetation," which is comprised of inflammatory cells, bacteria, fibrin, and platelets. Adherence of organisms is achieved by receptors that bind fibronectin in many gram-positive bacteria, a fibrinogen/fibrin binding protein on *S. aureus* (clumping factor), and glucan binding protein on streptococci.<sup>1</sup> *Streptococcus mutans* has additionally been shown to be able to bind and activate plasminogen, which could be part of the pathogenesis by which extracellular matrix molecules are degraded.<sup>15</sup> Organisms deep in the vegetation are metabolically active and resistant to antibiotics. The organisms are continuously released into the circulation and cleared by the immune system or re-colonize the vegetation. Endocarditis may arise as a result of vegetation embolization on the heart valve, damage to cardiac structures, and tissue injury due to circulating immune complexes. Embolized vegetation can lead to infection and/or infarction to distant sites such as the extremities and brain.

Patients with infective endocarditis have non-specific cardiac and non-cardiac symptoms. Heart murmurs represent cardiac pathology, specifically valvular damage. Significant regurgitant murmurs can lead to heart failure. The patient in the present study had a significant diastolic murmur as a result of his aortic and mitral valve insufficiency. Thirty to forty percent of patients have a murmur upon presentation and congestive heart failure occurs in as many people as well.<sup>1</sup> If the infection extends into the adjacent myocardial tissues, form abscesses, and extend through the epicardium, pericarditis can occur. Abscesses adjacent to the aortic valve can lead to disruption of the conductive system and heart block. Emboli can break off and end up in the coronary arteries resulting in myocardial infarction, although this is rare.<sup>16</sup> Hematogenous spread of infection can lead to focal infection in the skin, kidneys, meninges, and muscle. Arterial emboli are apparent in nearly 50% of patients clinically, particularly in patients with vegetations that are >10 mm in diameter.<sup>17</sup> Antibiotic treatment decreases embolic event rates that are 13/1,000 patient days in the first week to 1.2/1,000 patient days in the 3rd week.<sup>17</sup> Mimicking the more severe embolic lesions are Janeway lesions (under fingernails) and Osler's nodes seen in *S. aureus* endocarditis. Systemic emboli occur in 22% to 50% of endocarditis cases.<sup>18</sup> Of these, 60% to 70% involve the central nervous system, which result in severe and potentially lethal manifestations.<sup>18</sup>



The patient described in this case had his aortic valve replaced, which places him in another risk category of infective endocarditis. While prosthetic valve endocarditis presents the same way as native valve endocarditis does, the symptoms can be overlooked as morbidity associated with the surgery to replace the valve. The types of infections that occur during this time are significantly different from native valve infections and should be treated appropriately. Specifically, the most common infection within the first year is coag-negative staphylococcus.<sup>2</sup> The patient was started on coumadin on post-operative day #2 in order to reduce emboli formation in the new prosthetic aortic valve. He was released several days later with an INR of 2.9 (goal 2 to 3).

5. Left untreated, patients with infective endocarditis are at high risk for death. Therefore, it is important to institute therapy as quickly as possible. Bacterial vegetation is avascular and the bacteria are not proliferating, which makes eradication with antibiotics extremely difficult. Since complete eradication is necessary for therapy, antimicrobial therapy has to be bactericidal and long term.<sup>1</sup> In the present case, the aortic valve was replaced, the mitral valve repaired, and the vegetations removed. However, prolonged antibiotic therapy based on the presumed organisms needed to be given. Most viridans streptococcus species are susceptible to penicillin. However, recent studies have identified an increase in resistance to penicillin.<sup>19,20</sup>

**Native valve therapies.** If the viridans streptococci are penicillin susceptible (MIC <0.1 µg/mL), penicillin G or ceftriaxone is recommended.<sup>2</sup> Gentamicin can be given concomitantly in some cases, but is not recommended in patients with abscesses, extracardial foci, or prosthetic valve endocarditis.<sup>2</sup> In streptococcus species with a penicillin MIC >0.5 and enterococcus species, penicillin G (or ampicillin) with gentamicin for 4 to 6 weeks should be given.<sup>2</sup> In these patients, 6 weeks of antibiotic therapy is recommended if the symptoms have been longer than 3 months or if other complications such as myocardial abscess are present.<sup>2</sup> In native valve endocarditis where the culture is negative, antibiotics generally given include penicillin, ampicillin, ceftriaxone, or vancomycin in combination with an aminoglycoside.<sup>2</sup> The patient described in the present case was treated with vancomycin and tobramycin to be continued for 6 weeks in accordance with these previous studies. Both peak and trough drug levels were to be followed weekly to ensure that adequate drug levels were being achieved.

**Prognosis.** Mortality and morbidity are generally related to the patient's other diseases and endocarditis-related organ damage and not antibiotic failure.<sup>1</sup> Survival for patients with native valve endocarditis caused by viridans streptococci, HACEK organisms, or enterococci range from 85% to 90%.<sup>1</sup> A high rate of mortality (40% to 50%) is seen in prosthetic valve replacement if it occurs within the first 60 days.<sup>1</sup> Mortality is lower (10% to 20%) for later onset prosthetic valve infection.<sup>1</sup>

**Prevention.** Prophylactic antibiotics should be given to patients at risk for endocarditis undergoing procedures that have a high probability of inducing bacteremia (dental procedures likely to cause bleeding, tonsillectomy/adenoidectomy, surgery on infected tissues, surgery of airways/GI/GU tracts). The evidence for the benefit of antibiotic prophylaxis is modest and unproven.<sup>21,22</sup> It has been estimated that patients requiring penicillin are 5 times more likely to die from anaphylaxis than infective endocarditis.<sup>22</sup> Only one-half of patients with native valve endocarditis are diagnosed following a procedure.<sup>1</sup> However, maintaining dental hygiene is important for patients at risk for infective endocarditis.<sup>1</sup> In fact, poor dental health itself is a significant risk factor for the

development of endocarditis. Since the patient in this study had an ongoing history of dental disease, and his endocarditis source was likely from his oral flora, it is important that the patient resolves his dental problems. The rate of relapse in native valve penicillin-susceptible viridans streptococci is less than 2%; the relapse rate for enterococci is 8% to 20%.<sup>2</sup> These facts emphasize the need to resolve his dental problems, which also place him at a greater risk for relapse with his prosthetic valve. LM

## Keyword

Infective endocarditis, viridans streptococcus, *Enterococcus*

- Karchmer AW. Infective Endocarditis. In: *Kasper DL, Braunwald E, Fauci AS, et al, eds. Harrison's Principles of Internal Medicine*. 16th ed. New York: McGraw-Hill Companies, Inc.; 2005.
- Mylonakis E, Calderwood SB. Infective endocarditis in adults. *N Engl J Med*. 2001;345:1318-1330.
- Cabell CH, Abrutyn E, Karchmer AW. Cardiology patient page. Bacterial endocarditis: the disease, treatment, and prevention. *Circulation*. 2003;107:e185-187.
- Rovero C, Greub G, Lepidi H, et al. PCR detection of bacteria on cardiac valves of patients with treated bacterial endocarditis. *J Clin Microbiol*. 2005;43:163-167.
- Goldenberger D, Kunzli A, Vogt P, et al. Molecular diagnosis of bacterial endocarditis by broad-range PCR amplification and direct sequencing. *J Clin Microbiol*. Nov 1997;35:2733-2739.
- Grijalva M, Horvath R, Dendis M, et al. Molecular diagnosis of culture negative infective endocarditis: clinical validation in a group of surgically treated patients. *Heart*. Mar 2003;89:263-268.
- Houpikian P, Raoult D. Diagnostic methods current best practices and guidelines for identification of difficult-to-culture pathogens in infective endocarditis. *Infect Dis Clin North Am*. 2002;16:377-392.
- Ohara-Nemoto Y, Tajika S, Sasaki M, et al. Identification of Abiotrophia adiacens and Abiotrophia defectiva by 16S rRNA gene PCR and restriction fragment length polymorphism analysis. *J Clin Microbiol*. 1997;35:2458-2463.
- Qin X, Urdahl KB. PCR and sequencing of independent genetic targets for the diagnosis of culture negative bacterial endocarditis. *Diagn Microbiol Infect Dis*. 2001;40:145-149.
- Wilck MB, Wu Y, Howe JG, et al. Endocarditis caused by culture-negative organisms visible by Brown and Brenn staining: utility of PCR and DNA sequencing for diagnosis. *J Clin Microbiol*. 2001;39:2025-2027.
- Fournier PE, Raoult D. Nonculture Laboratory Methods for the Diagnosis of Infectious Endocarditis. *Curr Infect Dis Rep*. 1999;1:136-141.
- Durack DT, Lukes AS, Bright DK. New criteria for diagnosis of infective endocarditis: utilization of specific echocardiographic findings. Duke Endocarditis Service. *Am J Med*. 1994;96:200-209.
- Blanco-Carrion A. Bacterial endocarditis prophylaxis. *Med Oral Patol Oral Cir Bucal*. 2004;9 Suppl:44-51; 37-43.
- Tak T, Dhawan S, Reynolds C, et al. Current diagnosis and treatment of infective endocarditis. *Expert Rev Anti Infect Ther*. 2003;1:639-654.
- Jones MN, Holt RG. Activation of plasminogen by Streptococcus mutans. *Biochem Biophys Res Commun*. 2004;322:37-41.
- Beldner S, Bajwa A, Kaplan B, et al. Septic coronary embolism. *J Interv Cardiol*. 2002;15:301-304.
- Vilacosta I, Graupner C, San Roman JA, et al. Risk of embolization after institution of antibiotic therapy for infective endocarditis. *J Am Coll Cardiol*. 2002;39:1489-1495.
- Murtagh B, Frazier OH, Letsou GV. Diagnosis and management of bacterial endocarditis in 2003. *Curr Opin Cardiol*. 2003;18:106-110.
- Prabhu RM, Piper KE, Baddour LM, et al. Antimicrobial susceptibility patterns among viridans group streptococcal isolates from infective endocarditis patients from 1971 to 1986 and 1994 to 2002. *Antimicrob Agents Chemother*. 2004;48:4463-4465.
- Smith A, Jackson MS, Kennedy H. Antimicrobial susceptibility of viridans group streptococcal blood isolates to eight antimicrobial agents. *Scand J Infect Dis*. 2004;36(4):259-263.
- Oliver R, Roberts GJ, Hooper L. Penicillins for the prophylaxis of bacterial endocarditis in dentistry. *Cochrane Database Syst Rev*. 2004;CD003813.
- Seymour R. Is penicillin prophylaxis effective against bacterial endocarditis? *Evid Based Dent*. 2004;5:46.

# First and Only FDA Cleared Digital Cytology System

**Genius™ Cervical AI**

**Genius™ Review Station**

**Genius™ Digital Imager**

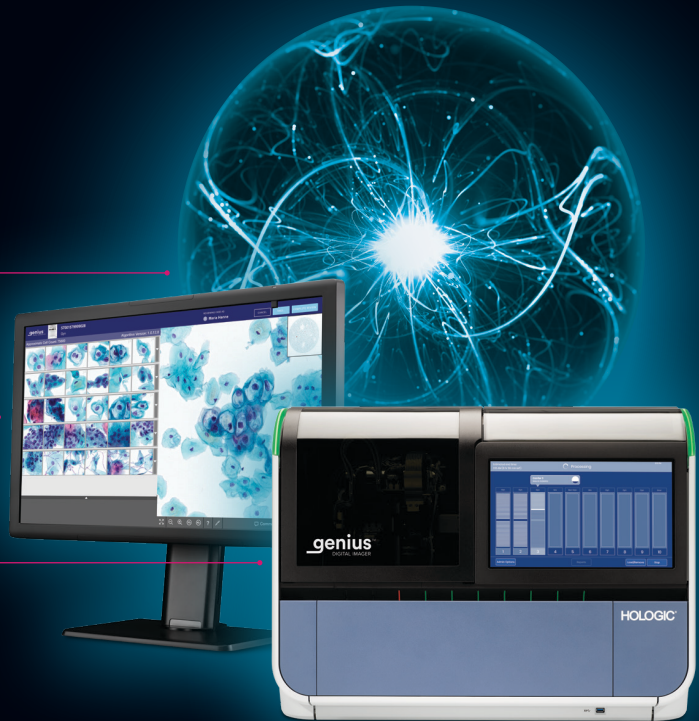

## Empower Your Genius With Ours

**Make a Greater Impact on Cervical Cancer**  
with the Advanced Technology of the  
Genius™ Digital Diagnostics System

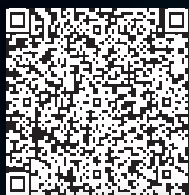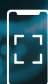

Click or Scan  
to discover more

ADS-04159-001 Rev 001 © 2024 Hologic, Inc. All rights reserved. Hologic, Genius, and associated logos are trademarks and/or registered trademarks of Hologic, Inc. and/or its subsidiaries in the United States and/or other countries. This information is intended for medical professionals in the U.S. and other markets and is not intended as a product solicitation or promotion where such activities are prohibited. Because Hologic materials are distributed through websites, podcasts and tradeshows, it is not always possible to control where such materials appear. For specific information on what products are available for sale in a particular country, please contact your Hologic representative or write to [diagnostic.solutions@hologic.com](mailto:diagnostic.solutions@hologic.com).

**genius™**  
DIGITAL DIAGNOSTICS
